# Supplementary material for: A Method for Analyzing AFM Force Mapping Data Obtained from Soft Tissue Cryosections
Source: PubMed Central journal article supplement — bioRxiv. 2023 Nov 13:2023.11.08.566263. Preprint. [Version 1] doi: 10.1101/2023.11.08.566263 (PMC10680563; doi:10.1101/2023.11.08.566263), 2023-11-13
Supplement: media-1.pdf [file media-1.pdf]

1 **Supplemental Materials**

2 *Supplemental Figure 1: Young's Modulus in Rat Sclera*

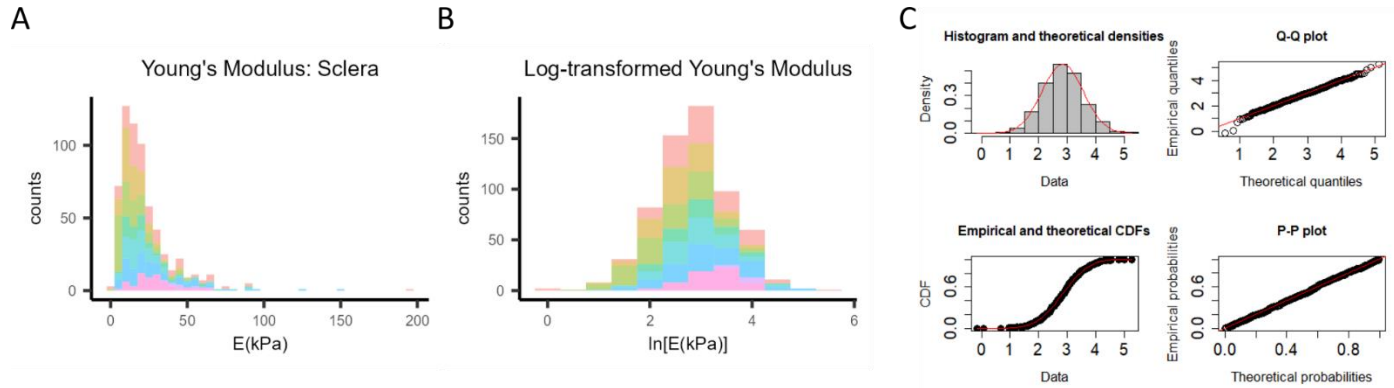

3

4 **A)** Histogram of scleral Young's modulus values ( $n=631$  measurements, 8 rat eyes). **B)** Log-transformed Young's  
5 modulus data showing an approximately normal distribution. **C)** Goodness-of-fit plots comparing a normal  
6 distribution fit to the log-transformed scleral Young's modulus values shows high agreement between empirical and  
7 theoretical data. This data passed the K-S normality test. See Figure 3 for explanation of plots.

8 *Supplemental Figure 2: Young's Modulus in Rat Cornea*

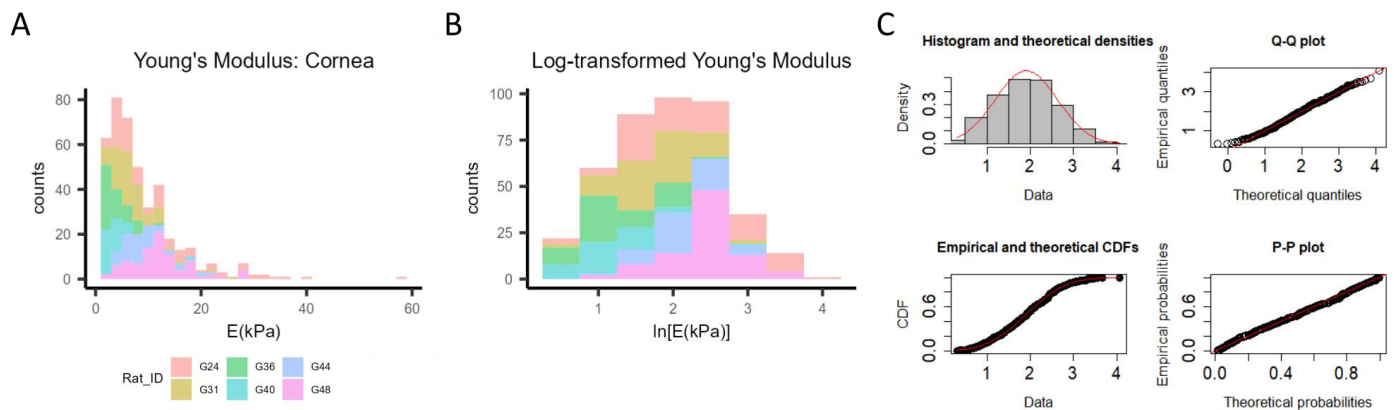

9

10 **A)** Histogram of cornea Young's modulus values ( $n=415$  measurements, 6 rat eyes). **B)** Log-transformed Young's  
11 modulus data showing an approximately normal distribution. **C)** Goodness-of-fit plots comparing a normal  
12 distribution fit to the log-transformed scleral Young's modulus values shows high agreement between empirical and  
13 theoretical data. This data passed the K-S normality test. See Figure 3 for explanation of plots.

14

15

16 *Supplemental Table 1: Mice used in this study*

| Mouse ID | Date of birth | Sacrifice date | Age   | Sex |
|----------|---------------|----------------|-------|-----|
| 36711    | 6/8/2021      | 5/17/2022      | 11 mo | M   |
| 37146*   | 9/3/2021      | 7/13/2022      | 10 mo | M   |
| 37148**  | 9/3/2021      | 7/13/2022      | 10 mo | F   |
| 37149    | 9/3/2021      | 7/13/2022      | 10 mo | F   |
| 37506    | 11/11/2021    | 9/14/2022      | 10 mo | F   |
| 37507    | 11/11/2021    | 9/14/2022      | 10 mo | F   |

17 \*Both eyes removed from analysis (not enough data/technical issues)

18 \*\* Only OS (left) eye used in analysis *Supplemental Table 2: Rats used in this study*

| Rat ID | Date of birth | Sacrifice date | Age  | Sex |
|--------|---------------|----------------|------|-----|
| G20    | 01/21/22      | 08/29/2022     | 7 mo | F   |
| G22    | 01/21/11      | 09/14/2022     | 7 mo | F   |
| G24    | 07/03/2022    | 10/24/2022     | 3 mo | F   |
| G31    | 07/03/2022    | 11/14/2022     | 4 mo | F   |
| G36    | 07/03/2022    | 11/28/2022     | 5 mo | F   |
| G40    | 10/03/2022    | 03/06/2023     | 5 mo | F   |
| G44    | 10/03/2022    | 03/19/2023     | 5 mo | F   |
| G48    | 10/03/2022    | 04/03/2023     | 6 mo | F   |

19

20

21 *Supplemental Table 3: Optic Nerve Head Outlier Removal data*

| Mouse         | Eye* | Geometric mean E (kPa) | Number of cryosections measured | Number of data points remaining after each quality control step |                                    |                                  |                                 |
|---------------|------|------------------------|---------------------------------|-----------------------------------------------------------------|------------------------------------|----------------------------------|---------------------------------|
|               |      |                        |                                 | Remove poor Hertz model fits                                    | Filter for indentation < 2 $\mu$ m | Filter for repeated measurements | Cook's distance outlier removal |
| 36711         | OD   | 2.391                  | 8                               | 137                                                             | 130                                | 107                              | 99                              |
|               | OS   | 1.125                  | 10                              | 157                                                             | 155                                | 155                              | 144                             |
| 37148         | OS   | 2.996                  | 8                               | 219                                                             | 193                                | 154                              | 150                             |
| 37149         | OD   | 0.91                   | 4                               | 83                                                              | 80                                 | 64                               | 64                              |
|               | OS   | 3.57                   | 6                               | 152                                                             | 135                                | 96                               | 91                              |
| 37506         | OS   | 0.941                  | 9                               | 117                                                             | 115                                | 78                               | 74                              |
|               | OD   | 1.148                  | 11                              | 154                                                             | 153                                | 153                              | 144                             |
| 37507         | OD   | 0.757                  | 5                               | 122                                                             | 108                                | 91                               | 86                              |
|               | OS   | 1.526                  | 4                               | 88                                                              | 85                                 | 64                               | 60                              |
| <b>Total:</b> |      |                        | 65                              | 1229                                                            | 1154                               | <b>962</b>                       | <b>912</b>                      |

22 \* OD = right eye, OS = left eye
